# Supplementary material for: Stochastic and Regulatory Role of Chromatin Silencing in Genomic Response to Environmental Changes
Source: PubMed Central journal article supplement (PMC2500160; doi:10.1371/journal.pone.0003002), 2008-08-20

Figure S2

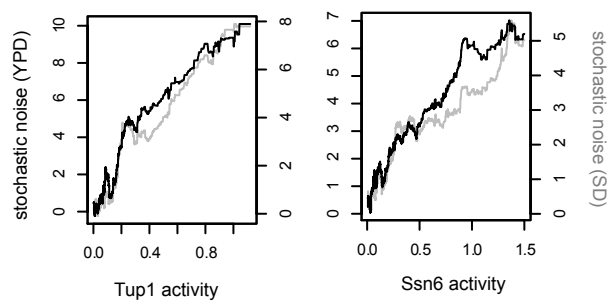

Supplement: pone.0003002.s003.pdf [file pone.0003002.s003.pdf]
