# Supplementary material for: Stochastic and Regulatory Role of Chromatin Silencing in Genomic Response to Environmental Changes
Source: PubMed Central journal article supplement (PMC2500160; doi:10.1371/journal.pone.0003002), 2008-08-20

Figure S5

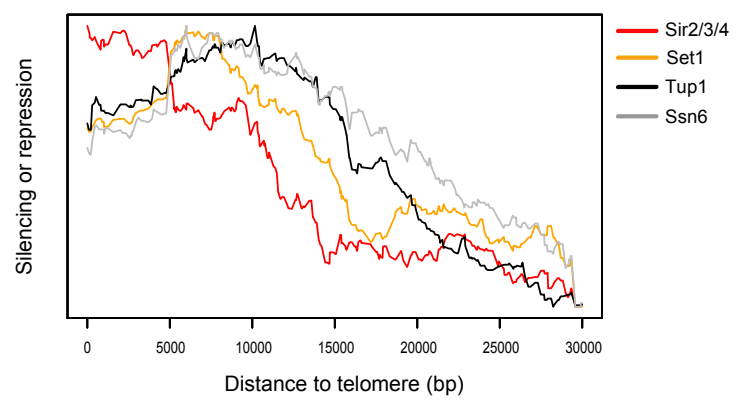

Supplement: pone.0003002.s006.pdf [file pone.0003002.s006.pdf]
