# Supplementary material for: Stochastic and Regulatory Role of Chromatin Silencing in Genomic Response to Environmental Changes
Source: PubMed Central journal article supplement (PMC2500160; doi:10.1371/journal.pone.0003002), 2008-08-20
Supplement: pone.0003002.s007.pdf [file pone.0003002.s007.pdf]

**Table S1.** Correlation of silencing activity measures and other silencing indices.

| <b>Silencing activity</b> | <b>transcription rate</b>                  | <b>chromatin repression</b>               | <b>histone methylation</b>                 |
|---------------------------|--------------------------------------------|-------------------------------------------|--------------------------------------------|
| Sir2/3/4                  | $r = -0.362$<br>$P = 3.3 \times 10^{-151}$ | $r = 0.242$<br>$P = 1.2 \times 10^{-79}$  | $r = -0.356$<br>$P = 1.3 \times 10^{-159}$ |
| Set1                      | $r = -0.384$<br>$P = 3.7 \times 10^{-169}$ | $r = 0.336$<br>$P = 4.6 \times 10^{-155}$ | $r = -0.483$<br>$P = 4.0 \times 10^{-308}$ |

Spearman's rank correlation (r) and its P value are reported.
