# Supplementary material for: Stochastic and Regulatory Role of Chromatin Silencing in Genomic Response to Environmental Changes
Source: PubMed Central journal article supplement (PMC2500160; doi:10.1371/journal.pone.0003002), 2008-08-20
Supplement: pone.0003002.s008.pdf [file pone.0003002.s008.pdf]

**Table S2.** Number of silent or repressed domains for a sliding window of varying size

| Regulator | 10kb | 20kb | 30kb | 40kb | <b>50kb</b> | 100kb |
|-----------|------|------|------|------|-------------|-------|
| Sir2/3/4  | 0    | 49   | 67   | 42   | <b>66</b>   | 200   |
| Set1      | 0    | 9    | 34   | 42   | <b>49</b>   | 14    |
| Tup1      | 0    | 0    | 4    | 0    | <b>0</b>    | 0     |
| Ssn6      | 0    | 0    | 1    | 1    | <b>2</b>    | 0     |
