# Supplementary material for: Stochastic and Regulatory Role of Chromatin Silencing in Genomic Response to Environmental Changes
Source: PubMed Central journal article supplement (PMC2500160; doi:10.1371/journal.pone.0003002), 2008-08-20
Supplement: pone.0003002.s009.pdf [file pone.0003002.s009.pdf]

## Supplementary Table 3

**mating, sporulation, filamentous growth, meiosis, reproduction, differentiation**  
 **signal transduction (during conjugation, receptor linked), DNA repair**  
 **response to stress and stimulus, detoxification of reactive oxygen species**  
 **metabolic, catabolic, biosynthetic processes, metabolite transport**  
 **maintenance of telomere or condensed chromosome**

| Gene Ontology category                                                          | avg. Sir2/3/4 |
|---------------------------------------------------------------------------------|---------------|
| regulation of conjugation with cellular fusion                                  | 1.53010       |
| signal transduction during conjugation with cellular fusion                     | 1.53010       |
| pheromone-dependent signal transduction during conjugation with cellular fusion | 1.53010       |
| regulation of conjugation                                                       | 1.53010       |
| G-protein coupled receptor protein signaling pathway                            | 1.30935 v     |
| response to pheromone during conjugation with cellular fusion                   | 1.17459       |
| vitamin B6 metabolic process                                                    | 1.03496 v     |
| pyridoxine metabolic process                                                    | 1.03496 v     |
| response to pheromone                                                           | 1.02318       |
| cell surface receptor linked signal transduction                                | 0.98881 v     |
| extracellular region                                                            | 0.98801       |
| meiotic DNA double-strand break formation                                       | 0.95308 v     |
| DNA catabolic process, endonucleolytic                                          | 0.90907 v     |
| mating projection tip                                                           | 0.89150       |
| sexual reproduction                                                             | 0.85914       |
| conjugation                                                                     | 0.85914       |
| conjugation with cellular fusion                                                | 0.85914       |
| peroxisomal matrix                                                              | 0.83553 v     |
| oxidoreductase activity, oxidizing metal ions, NAD or NADP as acceptor          | 0.82392 v     |
| ferric-chelate reductase activity                                               | 0.82392 v     |
| cell projection part                                                            | 0.81648       |
| cell projection                                                                 | 0.80118       |
| mating projection                                                               | 0.80118       |
| DNA catabolic process                                                           | 0.78156 v     |
| multi-organism process                                                          | 0.77759       |
| thiamin biosynthetic process                                                    | 0.73795 v     |
| synapsis                                                                        | 0.73622 v     |
| meiotic recombination                                                           | 0.71632       |
| thiamin and derivative biosynthetic process                                     | 0.71347 v     |
| thiamin metabolic process                                                       | 0.71081 v     |
| spore wall assembly (sensu Fungi)                                               | 0.70596 v     |
| spore wall assembly                                                             | 0.70596 v     |
| meiosis I                                                                       | 0.68582 v     |
| meiotic gene conversion                                                         | 0.68109 v     |
| telomeric DNA binding                                                           | 0.67857 v     |
| thiamin and derivative metabolic process                                        | 0.67684 v     |
| mating type determination                                                       | 0.66550       |
| reproductive developmental process                                              | 0.66550       |
| sex determination                                                               | 0.66550       |
| invasive growth (sensu Saccharomyces)                                           | 0.66305       |
| pre-autophagosomal structure                                                    | 0.65584 v     |
| integral to plasma membrane                                                     | 0.65265       |

|                                                                |           |
|----------------------------------------------------------------|-----------|
| microtubule binding                                            | 0.64240   |
| <b>mating type switching</b>                                   | 0.63819   |
| intrinsic to plasma membrane                                   | 0.63248   |
| <b>reproduction</b>                                            | 0.63065 v |
| <b>meiosis</b>                                                 | 0.62981 v |
| <b>meiotic cell cycle</b>                                      | 0.62981 v |
| <b>M phase of meiotic cell cycle</b>                           | 0.62981 v |
| <b>fructose transmembrane transporter activity</b>             | 0.62916 v |
| <b>mannose transmembrane transporter activity</b>              | 0.62916 v |
| <b>gene conversion at mating-type locus</b>                    | 0.62712   |
| plasma membrane part                                           | 0.62681   |
| <b>double-strand break repair via homologous recombination</b> | 0.62353   |
| <b>allantoin metabolic process</b>                             | 0.61981 v |
| <b>allantoin catabolic process</b>                             | 0.61981 v |
| <b>heterocycle catabolic process</b>                           | 0.61981 v |
| <b>sugar transmembrane transporter activity</b>                | 0.61602 v |
| <b>signal transducer activity</b>                              | 0.61517   |
| <b>molecular transducer activity</b>                           | 0.61517   |
| <b>hexose transmembrane transporter activity</b>               | 0.61455 v |
| <b>monosaccharide transmembrane transporter activity</b>       | 0.61455 v |
| <b>oxidoreductase activity, oxidizing metal ions</b>           | 0.60956 v |
| <b>monosaccharide transport</b>                                | 0.60572 v |
| <b>hexose transport</b>                                        | 0.60572 v |
| DNA-directed DNA polymerase activity                           | 0.60097   |
| <b>external encapsulating structure</b>                        | 0.59973   |
| <b>chitin- and beta-glucan-containing cell wall</b>            | 0.59973   |
| <b>cell wall</b>                                               | 0.59973   |
| <b>spore wall</b>                                              | 0.59382 v |
| <b>spore wall (sensu Fungi)</b>                                | 0.59382 v |
| <b>solute:cation symporter activity</b>                        | 0.59236 v |
| <b>symporter activity</b>                                      | 0.59236 v |
| <b>recombinational repair</b>                                  | 0.58350   |
| DNA recombination                                              | 0.57732   |
| <b>peroxisomal part</b>                                        | 0.57709   |
| <b>microbody part</b>                                          | 0.57709   |
| <b>glucose transmembrane transporter activity</b>              | 0.57429 v |
| <b>integral to peroxisomal membrane</b>                        | 0.56602   |
| <b>intrinsic to peroxisomal membrane</b>                       | 0.56602   |
| <b>double-strand break repair via single-strand annealing</b>  | 0.56598   |
| <b>phosphoinositide-mediated signaling</b>                     | 0.55709   |
| <b>inositol lipid-mediated signaling</b>                       | 0.55709   |
| <b>double-stranded DNA binding</b>                             | 0.55621   |
| <b>cell development</b>                                        | 0.55476   |
| <b>fatty acid beta-oxidation</b>                               | 0.55108   |
| <b>carbohydrate transport</b>                                  | 0.54848 v |
| mitotic recombination                                          | 0.54654   |
| <b>vitamin biosynthetic process</b>                            | 0.54637 v |
| <b>water-soluble vitamin biosynthetic process</b>              | 0.54637 v |

|                                                                                                 |           |
|-------------------------------------------------------------------------------------------------|-----------|
| double-strand break repair via nonhomologous end joining                                        | 0.54532   |
| carbohydrate transmembrane transporter activity                                                 | 0.54512 v |
| reproductive process                                                                            | 0.54510 v |
| cell communication                                                                              | 0.54001   |
| extrinsic to membrane                                                                           | 0.53978   |
| nitrogen compound catabolic process                                                             | 0.53789   |
| amine catabolic process                                                                         | 0.53789   |
| signal transduction                                                                             | 0.53766   |
| condensed chromosome                                                                            | 0.53646   |
| oxidoreductase activity, acting on the aldehyde or oxo group of donors, NAD or NADP as acceptor | 0.53581   |
| peroxisome                                                                                      | 0.53481   |
| microbody                                                                                       | 0.53481   |
| anaphase-promoting complex                                                                      | 0.53266   |
| nonprotein amino acid metabolic process                                                         | 0.53155   |
| cellular developmental process                                                                  | 0.53077 v |
| cell differentiation                                                                            | 0.53077 v |
| establishment of organelle localization                                                         | 0.52967   |
| prospore membrane                                                                               | 0.52830 v |
| immature spore                                                                                  | 0.52830 v |
| prospore                                                                                        | 0.52830 v |
| nuclear chromosome, telomeric region                                                            | 0.52686   |
| fermentation                                                                                    | 0.52647 v |
| glucosidase activity                                                                            | 0.52557 v |
| cellular response to extracellular stimulus                                                     | 0.52504   |
| cellular response to starvation                                                                 | 0.52504   |
| response to starvation                                                                          | 0.52504   |
| cellular response to nutrient levels                                                            | 0.52504   |
| reproductive sporulation                                                                        | 0.52308 v |
| sporulation (sensu Fungi)                                                                       | 0.52308 v |
| non-recombinational repair                                                                      | 0.52275   |
| microtubule associated complex                                                                  | 0.52257   |
| regulation of a molecular function                                                              | 0.52234   |
| sporulation                                                                                     | 0.52229 v |
| response to chemical stimulus                                                                   | 0.52163   |
| reproductive process in single-celled organism                                                  | 0.52029 v |
| reproductive cellular process                                                                   | 0.52029 v |
| condensed nuclear chromosome                                                                    | 0.51698 v |
| M phase                                                                                         | 0.51536   |
| regulation of catalytic activity                                                                | 0.51398   |
| filamentous growth                                                                              | 0.51356   |
| regulation of transcription by carbon catabolites                                               | 0.51318 v |
| multidrug transporter activity                                                                  | 0.51294   |
| deacetylase activity                                                                            | 0.51230   |
| response to external stimulus                                                                   | 0.51186   |
| response to extracellular stimulus                                                              | 0.51186   |
| response to nutrient levels                                                                     | 0.51186   |
| hydrolase activity, acting on carbon-nitrogen (but not peptide) bonds, in linear amides         | 0.50700   |
| telomere maintenance via recombination                                                          | 0.50532   |
| fatty acid oxidation                                                                            | 0.50512   |
| endodeoxyribonuclease activity                                                                  | 0.50498 v |
| cellular response to stress                                                                     | 0.50192   |
| cellular response to stimulus                                                                   | 0.50192   |
