# Supplementary material for: Stochastic and Regulatory Role of Chromatin Silencing in Genomic Response to Environmental Changes
Source: PubMed Central journal article supplement (PMC2500160; doi:10.1371/journal.pone.0003002), 2008-08-20
Supplement: pone.0003002.s010.pdf [file pone.0003002.s010.pdf]

## Table S4

metabolic, catabolic, biosynthetic processes, metabolite transport  
sporulation, meiosis, reproduction, differentiation  
detoxification of reactive oxygen species, response to stress and stimulus  
receptor linked signal transduction  
maintanence of telomere or condensed chromosome

| Gene Ontology category                                                 | avg. Set1 |
|------------------------------------------------------------------------|-----------|
| allantoin metabolic process                                            | 1.01550 v |
| allantoin catabolic process                                            | 1.01550 v |
| heterocycle catabolic process                                          | 1.01550 v |
| solute:cation symporter activity                                       | 0.99083 v |
| symporter activity                                                     | 0.99083 v |
| fructose transmembrane transporter activity                            | 0.93482 v |
| mannose transmembrane transporter activity                             | 0.93482 v |
| aryl-alcohol dehydrogenase activity                                    | 0.93438   |
| sugar transmembrane transporter activity                               | 0.89429 v |
| carbohydrate transmembrane transporter activity                        | 0.85789 v |
| hexose transmembrane transporter activity                              | 0.85085 v |
| monosaccharide transmembrane transporter activity                      | 0.85085 v |
| glucose transmembrane transporter activity                             | 0.85085 v |
| glucosidase activity                                                   | 0.83744 v |
| vitamin B6 metabolic process                                           | 0.83314 v |
| pyridoxine metabolic process                                           | 0.83314 v |
| carbohydrate transport                                                 | 0.81267 v |
| monosaccharide transport                                               | 0.79281 v |
| hexose transport                                                       | 0.79281 v |
| glutathione metabolic process                                          | 0.78500   |
| meiotic DNA double-strand break formation                              | 0.73417 v |
| cysteine-type peptidase activity                                       | 0.71318   |
| peroxisomal matrix                                                     | 0.71278 v |
| siderophore transport                                                  | 0.70950   |
| pre-autophagosomal structure                                           | 0.70850 v |
| aldehyde metabolic process                                             | 0.69267   |
| oxidoreductase activity, oxidizing metal ions, NAD or NADP as acceptor | 0.69233 v |
| ferric-chelate reductase activity                                      | 0.69233 v |
| heterocycle metabolic process                                          | 0.68933   |
| response to toxin                                                      | 0.68543   |
| prospore membrane                                                      | 0.68415 v |
| immature spore                                                         | 0.68415 v |
| prospore                                                               | 0.68415 v |
| hydrolase activity, hydrolyzing O-glycosyl compounds                   | 0.68000   |
| iron ion transport                                                     | 0.67556   |
| polyamine transmembrane transporter activity                           | 0.67167   |
| secondary metabolic process                                            | 0.66617   |
| thiamin metabolic process                                              | 0.66565 v |
| DNA catabolic process, endonucleolytic                                 | 0.65825 v |

|                                                                                       |           |
|---------------------------------------------------------------------------------------|-----------|
| aldo-keto reductase activity                                                          | 0.65783   |
| unfolded protein binding                                                              | 0.65777   |
| spore wall assembly (sensu Fungi)                                                     | 0.65677 v |
| spore wall assembly                                                                   | 0.65677 v |
| reproductive sporulation                                                              | 0.64264 v |
| sporulation (sensu Fungi)                                                             | 0.64264 v |
| thiamin and derivative metabolic process                                              | 0.64017 v |
| secondary active transmembrane transporter activity                                   | 0.62729   |
| thiamin biosynthetic process                                                          | 0.62719 v |
| thiamin and derivative biosynthetic process                                           | 0.62719 v |
| G-protein coupled receptor protein signaling pathway                                  | 0.62629 v |
| cell surface receptor linked signal transduction                                      | 0.62629 v |
| response to nutrient                                                                  | 0.62314   |
| oxidoreductase activity, oxidizing metal ions                                         | 0.62263 v |
| DNA catabolic process                                                                 | 0.62189 v |
| sporulation                                                                           | 0.61975 v |
| nucleobase metabolic process                                                          | 0.61400   |
| polyamine transport                                                                   | 0.61129   |
| hydrolase activity, acting on glycosyl bonds                                          | 0.60574   |
| de novo pyrimidine base biosynthetic process                                          | 0.60517   |
| sister chromatid cohesion                                                             | 0.60267   |
| regulation of transcription by carbon catabolites                                     | 0.60117 v |
| vitamin transport                                                                     | 0.59767   |
| amine transmembrane transporter activity                                              | 0.59700   |
| reproductive process in single-celled organism                                        | 0.59188 v |
| reproductive cellular process                                                         | 0.59188 v |
| monocarboxylic acid transmembrane transporter activity                                | 0.59175   |
| spore wall                                                                            | 0.59067 v |
| spore wall (sensu Fungi)                                                              | 0.59067 v |
| vitamin biosynthetic process                                                          | 0.58707 v |
| water-soluble vitamin biosynthetic process                                            | 0.58707 v |
| oxidoreductase activity, acting on the CH-OH group of donors, NAD or NADP as acceptor | 0.58570   |
| cellular developmental process                                                        | 0.58389 v |
| cell differentiation                                                                  | 0.58389 v |
| di-, tri-valent inorganic cation transport                                            | 0.58262   |
| oxidoreductase activity, acting on CH-OH group of donors                              | 0.58129   |
| synapsis                                                                              | 0.57100 v |
| oxidoreductase activity, acting on peroxide as acceptor                               | 0.57000   |
| peroxidase activity                                                                   | 0.57000   |
| reproductive process                                                                  | 0.56892 v |
| vitamin metabolic process                                                             | 0.56298   |
| water-soluble vitamin metabolic process                                               | 0.56298   |
| glycogen metabolic process                                                            | 0.56242   |
| NADH metabolic process                                                                | 0.55783   |
| carboxy-lyase activity                                                                | 0.55590   |
| reproduction of a single-celled organism                                              | 0.55397   |
| meiosis                                                                               | 0.55351 v |
| meiotic cell cycle                                                                    | 0.55351 v |
| M phase of meiotic cell cycle                                                         | 0.55351 v |

|                                                                |           |
|----------------------------------------------------------------|-----------|
| <b>sulfur metabolic process</b>                                | 0.54413   |
| <b>meiotic gene conversion</b>                                 | 0.54367 v |
| transcription factor binding                                   | 0.54250   |
| <b>sulfur compound biosynthetic process</b>                    | 0.54120   |
| <b>active transmembrane transporter activity</b>               | 0.53997   |
| <b>nitrogen utilization</b>                                    | 0.53388   |
| <b>pyrimidine base biosynthetic process</b>                    | 0.53100   |
| <b>cellular carbohydrate catabolic process</b>                 | 0.52968   |
| <b>carbohydrate catabolic process</b>                          | 0.52968   |
| <b>condensed nuclear chromosome</b>                            | 0.52944 v |
| <b>transition metal ion transport</b>                          | 0.52924   |
| plasma membrane                                                | 0.52275   |
| RNA methyltransferase activity                                 | 0.52000   |
| <b>carbon-carbon lyase activity</b>                            | 0.51307   |
| <b>fermentation</b>                                            | 0.50950 v |
| <b>telomeric DNA binding</b>                                   | 0.50667 v |
| endodeoxyribonuclease activity                                 | 0.50644 v |
| <b>meiosis I</b>                                               | 0.50587 v |
| <b>transition metal ion transmembrane transporter activity</b> | 0.50308   |
| <b>reproduction</b>                                            | 0.50206 v |
| <b>cell division</b>                                           | 0.50160   |
| deoxyribonuclease activity                                     | 0.50127   |
| <b>energy reserve metabolic process</b>                        | 0.50080   |
| <b>O-acyltransferase activity</b>                              | 0.50063   |
