# Supplementary material for: Stochastic and Regulatory Role of Chromatin Silencing in Genomic Response to Environmental Changes
Source: PubMed Central journal article supplement (PMC2500160; doi:10.1371/journal.pone.0003002), 2008-08-20
Supplement: pone.0003002.s012.pdf [file pone.0003002.s012.pdf]

## Table S6

| stress condition                      | Sir2/3/4 | Set1    | Noise (ygd) | # responsive genes |
|---------------------------------------|----------|---------|-------------|--------------------|
| aa.starv.0.5.h                        | 0.00000  | 2.98161 | 1.18851     | 512                |
| aa.starv.1.h                          | 1.28073  | 3.83267 | 7.97212     | 111                |
| aa.starv.2.h                          | 0.51308  | 2.15272 | 4.03289     | 63                 |
| aa.starv.4.h                          | 1.05383  | 4.67773 | 5.34344     | 83                 |
| aa.starv.6.h                          | 2.52070  | 7.10786 | 3.75957     | 91                 |
| AFT2_H2O2Hi                           | 0.26955  | 1.50343 | 0.61792     | 61                 |
| AFT2_H2O2Lo                           | 0.46470  | 2.23378 | 0.66326     | 115                |
| ARG81_SM                              | 0.54657  | 0.53150 | 1.48537     | 28                 |
| ARO80_SM                              | 0.77765  | 0.41461 | 0.76815     | 32                 |
| ASH1_BUT14                            | 0.61198  | 0.01550 | 2.99401     | 51                 |
| BAS1_SM                               | 0.30969  | 0.23997 | 0.97205     | 17                 |
| CAD1_SM                               | 0.45041  | 0.38114 | 0.12580     | 26                 |
| CBF1_SM                               | 0.22914  | 0.15725 | 0.73943     | 281                |
| CHA4_SM                               | 0.11255  | 0.13180 | 0.41099     | 37                 |
| CIN5_H2O2Hi                           | 0.41621  | 1.63351 | 1.80358     | 81                 |
| CIN5_H2O2Lo                           | 0.29729  | 3.33165 | 0.73403     | 129                |
| constant.0.32.mM.H2O2..10.min..redo   | 0.30419  | 1.46291 | 4.33038     | 156                |
| constant.0.32.mM.H2O2..100.min..redo  | 0.81004  | 0.19825 | 3.18034     | 24                 |
| constant.0.32.mM.H2O2..120.min..redo  | 1.25541  | 0.04043 | 4.25121     | 22                 |
| constant.0.32.mM.H2O2..160.min..redo  | 1.44664  | 0.41410 | 3.60009     | 30                 |
| constant.0.32.mM.H2O2..20.min..redo   | 0.00915  | 4.58786 | 3.06701     | 345                |
| constant.0.32.mM.H2O2..30.min..redo   | 0.00072  | 3.82430 | 5.64979     | 254                |
| constant.0.32.mM.H2O2..40.min..rescan | 0.37382  | 0.60500 | 3.33876     | 160                |
| constant.0.32.mM.H2O2..50.min..redo   | 0.16995  | 2.63389 | 8.82571     | 74                 |
| constant.0.32.mM.H2O2..60.min..redo   | 0.54486  | 2.64168 | 6.14760     | 63                 |
| constant.0.32.mM.H2O2..80.min..redo   | 0.70365  | 0.27791 | 1.84527     | 23                 |
| DAL80_RAPA                            | 1.97896  | 1.23125 | 0.42035     | 40                 |
| DAL81_RAPA                            | 0.07479  | 1.38662 | 3.52490     | 96                 |
| DAL82_RAPA                            | 0.49979  | 1.88488 | 1.46291     | 56                 |
| DAL82_SM                              | 0.42902  | 0.30051 | 0.98615     | 59                 |
| diauxic.shift.timecourse.18.5.h       | 0.01591  | 0.73513 | 11.37926    | 172                |
| diauxic.shift.timecourse.20.5.h       | 0.00000  | 0.66779 | 3.84728     | 315                |
| DIG1_Alpha                            | 6.02862  | 0.53441 | 1.06249     | 76                 |
| DIG1_BUT14                            | 5.97608  | 0.31313 | 0.14481     | 67                 |
| DIG1_BUT90                            | 5.13425  | 0.26775 | 0.84133     | 42                 |
| dt.000.min..dt.2                      | 1.65033  | 1.08314 | 1.78923     | 51                 |
| dt.015.min..dt.2                      | 3.70074  | 4.07503 | 2.60859     | 65                 |
| dt.030.min..dt.2                      | 1.73351  | 1.59622 | 0.20196     | 25                 |
| dt.120.min..dt.2                      | 0.14952  | 0.24999 | 1.21557     | 18                 |
| dt.240.min..dt.2                      | 0.00006  | 0.09039 | 0.19829     | 133                |
| FHL1_RAPA                             | 0.00000  | 0.00010 | 0.00267     | 191                |
| FHL1_SM                               | 0.00000  | 0.00077 | 0.00277     | 204                |
| FKH2_H2O2Hi                           | 0.57806  | 0.14475 | 1.36429     | 108                |
| FKH2_H2O2Lo                           | 0.42415  | 0.47552 | 0.70600     | 31                 |

|                                 |         |          |          |     |
|---------------------------------|---------|----------|----------|-----|
| GAL4_GAL                        | 0.50723 | 0.73188  | 0.01207  | 41  |
| GAL4_RAFF                       | 1.34679 | 1.62412  | 0.16101  | 39  |
| GAT1_RAPA                       | 0.15297 | 0.24419  | 0.69298  | 27  |
| GAT1_SM                         | 0.47582 | 1.41275  | 0.57756  | 47  |
| GCN4_RAPA                       | 0.03040 | 0.03515  | 4.34942  | 161 |
| GCN4_SM                         | 0.06738 | 0.09111  | 5.56044  | 187 |
| GCR2_SM                         | 0.69782 | 0.32646  | 0.53650  | 56  |
| GLN3_RAPA                       | 0.07484 | 0.11096  | 4.17307  | 67  |
| GLN3_SM                         | 0.02713 | 1.02865  | 2.09374  | 50  |
| GZF3_H2O2Hi                     | 0.30158 | 0.07712  | 0.79396  | 13  |
| GZF3_RAPA                       | 3.70845 | 1.96119  | 0.83550  | 39  |
| HAP2_RAPA                       | 0.97110 | 0.64191  | 4.33205  | 42  |
| HAP4_H2O2Lo                     | 0.05545 | 0.35541  | 0.05169  | 24  |
| HAP5_SM                         | 0.29880 | 0.42907  | 3.82253  | 39  |
| Heat.Shock.000.minutes..hs.2    | 2.26514 | 4.86874  | 15.74488 | 143 |
| Heat.Shock.000.minutes..hs.2.1  | 0.71286 | 3.44953  | 11.67214 | 121 |
| Heat.Shock.000.minutes.hs.2     | 0.25202 | 1.00552  | 12.08872 | 91  |
| Heat.Shock.005.minutes..hs.2    | 0.76265 | 0.24017  | 0.92613  | 18  |
| Heat.Shock.015.minutes..hs.2    | 0.00000 | 4.86734  | 1.98341  | 203 |
| Heat.Shock.030inutes..hs.2      | 0.00001 | 1.23213  | 2.43026  | 60  |
| Heat.Shock.05.minutes.hs.1      | 0.54407 | 5.32702  | 6.20872  | 174 |
| Heat.Shock.060.minutes..hs.2    | 0.43892 | 1.44031  | 1.64903  | 60  |
| Heat.Shock.10.minutes.hs.1      | 0.00001 | 12.98378 | 4.59920  | 582 |
| Heat.Shock.15.minutes.hs.1      | 0.00000 | 2.48692  | 5.03499  | 752 |
| heat.shock.17.to.37..20.minutes | 0.00000 | 2.17196  | 7.37643  | 896 |
| Heat.Shock.20.minutes.hs.1      | 0.00000 | 3.15311  | 6.84277  | 690 |
| heat.shock.21.to.37..20.minutes | 0.00000 | 0.74424  | 8.55527  | 792 |
| heat.shock.25.to.37..20.minutes | 0.00000 | 1.18602  | 7.05751  | 793 |
| heat.shock.29.to.37..20.minutes | 0.00000 | 1.96210  | 8.27610  | 552 |
| Heat.Shock.30.minutes.hs.1      | 0.00012 | 6.05080  | 8.98114  | 554 |
| heat.shock.33.to.37..20.minutes | 0.02239 | 2.02243  | 13.71856 | 211 |
| Heat.Shock.40.minutes.hs.1      | 0.11288 | 4.17893  | 7.62653  | 223 |
| Heat.Shock.60.minutes.hs.1      | 0.06060 | 0.56079  | 7.75219  | 45  |
| Heat.Shock.80.minutes.hs.1      | 1.25477 | 0.88717  | 5.73445  | 47  |
| HSF1_H2O2Hi                     | 0.00573 | 0.00519  | 1.27971  | 125 |
| HSF1_H2O2Lo                     | 0.00475 | 0.01463  | 1.19807  | 102 |
| Hypo.osmotic.shock...15.min     | 1.40033 | 1.23200  | 4.33665  | 23  |
| Hypo.osmotic.shock...30.min     | 3.91581 | 3.55790  | 1.78282  | 66  |
| Hypo.osmotic.shock...45.min     | 2.04767 | 1.69873  | 2.53399  | 48  |
| Hypo.osmotic.shock...5.min      | 4.52859 | 0.43660  | 3.55265  | 25  |
| Hypo.osmotic.shock...60.min     | 0.62291 | 0.27423  | 1.17412  | 23  |
| IME4_H2O2Hi                     | 0.35899 | 0.58383  | 2.50773  | 34  |
| LEU3_SM                         | 0.02088 | 0.16482  | 2.28507  | 27  |
| MAC1_H2O2Hi                     | 0.94190 | 1.25049  | 0.60139  | 18  |
| MAL33_H2O2Hi                    | 0.15753 | 0.45116  | 0.07728  | 38  |
| MBP1_H2O2Hi                     | 0.05338 | 0.03154  | 0.05593  | 135 |

|                            |         |          |          |     |
|----------------------------|---------|----------|----------|-----|
| MBP1_H2O2Lo                | 0.24309 | 0.02540  | 0.70927  | 61  |
| MCM1_Alpha                 | 1.53670 | 0.39706  | 0.88543  | 107 |
| MET31_SM                   | 0.15863 | 3.07606  | 0.27081  | 14  |
| MET32_SM                   | 0.92204 | 0.50290  | 0.91755  | 41  |
| MET4_SM                    | 0.05220 | 0.37042  | 0.13900  | 28  |
| MOT3_H2O2Hi                | 0.16361 | 1.46665  | 0.78673  | 12  |
| MSN2_Acid                  | 0.39784 | 0.00937  | 1.21907  | 31  |
| MSN2_H2O2Hi                | 0.40902 | 0.38912  | 5.36353  | 79  |
| MSN2_H2O2Lo                | 0.18410 | 0.00812  | 3.97973  | 47  |
| MSN2_RAPA                  | 2.71298 | 0.84988  | 0.27604  | 51  |
| MSN4_H2O2Hi                | 0.19895 | 0.22753  | 3.02776  | 71  |
| MSN4_H2O2Lo                | 0.81629 | 0.15667  | 2.87175  | 19  |
| MSN4_RAPA                  | 2.51704 | 0.83717  | 0.09506  | 57  |
| MSS11_BUT14                | 0.41687 | 0.79447  | 0.50271  | 25  |
| Nitrogen.Depletion.1.d     | 1.95739 | 13.95895 | 2.53631  | 558 |
| Nitrogen.Depletion.1.h     | 0.00000 | 2.54820  | 1.20081  | 350 |
| Nitrogen.Depletion.12.h    | 0.19228 | 4.79148  | 2.08057  | 446 |
| Nitrogen.Depletion.2.d     | 3.02837 | 12.96782 | 3.22712  | 544 |
| Nitrogen.Depletion.2.h     | 0.97518 | 5.95842  | 10.78028 | 117 |
| Nitrogen.Depletion.3.d     | 2.33525 | 9.32961  | 3.17478  | 653 |
| Nitrogen.Depletion.30.min. | 0.00000 | 8.01052  | 3.73559  | 331 |
| Nitrogen.Depletion.4.h     | 0.70605 | 5.26004  | 6.35772  | 81  |
| Nitrogen.Depletion.5.d     | 3.50530 | 9.93144  | 3.43005  | 635 |
| Nitrogen.Depletion.8.h     | 0.00010 | 1.41732  | 1.45033  | 452 |
| NRG1_H2O2Hi                | 0.60276 | 2.09861  | 5.45398  | 128 |
| NRG1_H2O2Lo                | 2.60808 | 5.38837  | 0.63200  | 47  |
| PHD1_BUT90                 | 2.62629 | 3.20562  | 1.28907  | 113 |
| PHO2_H2O2Hi                | 0.82102 | 0.61573  | 1.96545  | 16  |
| PHO2_SM                    | 0.33821 | 0.20126  | 1.60633  | 24  |
| PHO4_Pi.                   | 0.92647 | 0.31180  | 0.10323  | 31  |
| PUT3_H2O2Lo                | 0.14073 | 0.73231  | 1.18326  | 90  |
| PUT3_SM                    | 0.28261 | 1.55978  | 2.25646  | 29  |
| RCS1_H2O2Hi                | 0.22168 | 1.84747  | 1.79610  | 52  |
| RCS1_H2O2Lo                | 0.07212 | 0.06801  | 0.07228  | 261 |
| RCS1_SM                    | 0.61992 | 0.34532  | 0.66510  | 24  |
| RDS1_H2O2Hi                | 0.22580 | 0.25452  | 0.36015  | 46  |
| REB1_H2O2Hi                | 0.02201 | 0.33154  | 0.04093  | 59  |
| RIM101_H2O2Hi              | 0.19738 | 0.04228  | 1.66636  | 16  |
| RIM101_H2O2Lo              | 1.75192 | 5.07638  | 0.89576  | 55  |
| ROX1_H2O2Hi                | 1.89036 | 3.19913  | 1.03683  | 57  |
| RPH1_H2O2Hi                | 0.14574 | 0.69046  | 0.33841  | 29  |
| RPN4_H2O2Hi                | 0.10153 | 0.27755  | 0.09040  | 13  |
| RPN4_H2O2Lo                | 0.00002 | 0.00936  | 0.01099  | 100 |
| RTG1_RAPA                  | 2.01830 | 0.93850  | 0.00001  | 31  |
| RTG3_H2O2Hi                | 0.26772 | 0.79990  | 0.86302  | 37  |
| RTG3_RAPA                  | 0.30774 | 1.25822  | 3.04847  | 54  |

|                                                      |         |         |          |     |
|------------------------------------------------------|---------|---------|----------|-----|
| RTG3_SM                                              | 0.20589 | 1.11376 | 1.90816  | 32  |
| SFP1_H2O2Lo                                          | 0.11598 | 0.83284 | 0.16835  | 18  |
| SFP1_SM                                              | 0.00001 | 0.01134 | 0.00481  | 46  |
| SKN7_H2O2Hi                                          | 0.41937 | 0.38331 | 6.01962  | 103 |
| SKN7_H2O2Lo                                          | 0.67648 | 0.23091 | 9.19923  | 190 |
| SOK2_BUT14                                           | 0.75164 | 1.50502 | 2.06058  | 73  |
| STE12_Alpha                                          | 7.00925 | 1.11352 | 1.30628  | 125 |
| STE12_BUT14                                          | 7.51951 | 0.27839 | 0.70820  | 135 |
| STE12_BUT90                                          | 8.81993 | 0.34490 | 1.17518  | 105 |
| steady.state.1M.sorbitol                             | 4.94116 | 2.58163 | 0.65028  | 135 |
| STP1_SM                                              | 0.96280 | 1.28265 | 1.77213  | 72  |
| TEC1_Alpha                                           | 6.13045 | 2.41444 | 1.27890  | 43  |
| TEC1_BUT14                                           | 2.04649 | 1.14808 | 0.14663  | 38  |
| THI2_Thi.                                            | 0.62114 | 0.47934 | 2.40097  | 47  |
| UME6_H2O2Hi                                          | 0.69155 | 1.74344 | 0.08478  | 103 |
| X1.5.mM.diamide..10.min.                             | 0.00019 | 1.81611 | 15.07066 | 152 |
| X1.5.mM.diamide..20.min.                             | 0.00000 | 4.48759 | 11.96224 | 332 |
| X1.5.mM.diamide..30.min.                             | 0.00002 | 3.93155 | 11.49386 | 293 |
| X1.5.mM.diamide..40.min.                             | 0.06999 | 3.02057 | 19.94591 | 205 |
| X1.5.mM.diamide..5.min.                              | 0.22488 | 1.14013 | 5.39354  | 30  |
| X1.5.mM.diamide..50.min.                             | 0.27704 | 5.48208 | 12.04464 | 111 |
| X1.5.mM.diamide..60.min.                             | 1.03293 | 3.71984 | 18.04631 | 123 |
| X1.5.mM.diamide..90.min.                             | 0.19383 | 1.09648 | 4.46554  | 43  |
| X1.mM.Menadione..10.min.redo                         | 0.67827 | 0.17638 | 2.48907  | 23  |
| X1.mM.Menadione..105.min..redo                       | 0.12507 | 1.28561 | 4.30658  | 54  |
| X1.mM.Menadione..120.min.redo                        | 0.57238 | 0.75913 | 4.88632  | 76  |
| X1.mM.Menadione..160.min..redo                       | 0.20912 | 0.52474 | 4.52153  | 42  |
| X1.mM.Menadione..20.min..redo                        | 0.64968 | 1.51821 | 6.09134  | 44  |
| X1.mM.Menadione..30.min..redo                        | 0.09164 | 0.29085 | 7.45031  | 48  |
| X1.mM.Menadione..50.min.redo                         | 1.32994 | 0.44845 | 4.00182  | 41  |
| X1.mM.Menadione..80.min..redo                        | 3.37938 | 2.58888 | 2.70606  | 74  |
| X1M.sorbitol...15.min                                | 0.00251 | 3.86984 | 5.59017  | 181 |
| X1M.sorbitol...30.min                                | 0.34124 | 2.15326 | 11.45698 | 71  |
| X1M.sorbitol...45.min                                | 1.29155 | 4.04069 | 4.30535  | 29  |
| X1M.sorbitol...5.min                                 | 0.94088 | 0.08055 | 2.74586  | 17  |
| X1mM.Menadione..40.min..redo                         | 0.41977 | 0.51804 | 4.55343  | 50  |
| X2.5mM.DTT.005.min.dtt.1                             | 3.55623 | 4.06452 | 0.02679  | 74  |
| X2.5mM.DTT.015.min.dtt.1                             | 3.88271 | 4.64340 | 1.65059  | 37  |
| X2.5mM.DTT.030.min.dtt.1                             | 0.45326 | 0.71588 | 1.74154  | 46  |
| X2.5mM.DTT.045.min.dtt.1                             | 0.12826 | 0.01097 | 2.76095  | 48  |
| X2.5mM.DTT.060.min.dtt.1                             | 0.34281 | 0.29323 | 2.55470  | 67  |
| X2.5mM.DTT.090.min.dtt.1                             | 0.22055 | 0.11739 | 3.36298  | 67  |
| X2.5mM.DTT.120.min.dtt.1                             | 0.04277 | 1.05782 | 5.21898  | 160 |
| X2.5mM.DTT.180.min.dtt.1                             | 0.00153 | 0.51894 | 2.01835  | 207 |
| X29C..1M.sorbitol.to.33C....NO.sorbitol...15.minutes | 1.39328 | 2.34256 | 3.17575  | 49  |
| X29C..1M.sorbitol.to.33C....NO.sorbitol...30.minutes | 1.82630 | 1.58167 | 3.76089  | 38  |

|                                                     |         |         |          |     |
|-----------------------------------------------------|---------|---------|----------|-----|
| X29C..1M.sorbitol.to.33C....NO.sorbitol...5.minutes | 2.22719 | 0.94294 | 5.27846  | 82  |
| X29C..1M.sorbitol.to.33C...1M.sorbitol...15.minutes | 2.04625 | 1.23420 | 12.79633 | 97  |
| X29C..1M.sorbitol.to.33C...1M.sorbitol...5.minutes  | 1.07816 | 1.29272 | 9.15032  | 69  |
| X29C.to.33C...15.minutes                            | 1.85113 | 2.00499 | 14.39222 | 94  |
| X29C.to.33C...30.minutes                            | 0.85385 | 0.80664 | 1.71251  | 102 |
| X29C.to.33C...5.minutes                             | 2.63402 | 2.58856 | 9.04835  | 226 |
| X33C.vs..30C...90.minutes                           | 0.27265 | 0.77126 | 0.21950  | 22  |
| X37C.to.25C.shock...15.min                          | 9.68086 | 2.39389 | 3.10558  | 267 |
| X37C.to.25C.shock...30.min                          | 2.26742 | 1.34081 | 2.76777  | 142 |
| X37C.to.25C.shock...45.min                          | 2.60182 | 2.41667 | 7.10059  | 142 |
| X37C.to.25C.shock...60.min                          | 3.73924 | 1.07555 | 6.40255  | 150 |
| X37C.to.25C.shock...90.min                          | 0.29948 | 0.94947 | 4.59196  | 57  |
| XBP1_H2O2Lo                                         | 4.79943 | 3.58533 | 0.40665  | 77  |
| YAP1_H2O2Lo                                         | 0.00746 | 0.82772 | 0.88762  | 38  |
| YAP6_H2O2Hi                                         | 2.57334 | 4.21857 | 0.62519  | 90  |
| YAP6_H2O2Lo                                         | 1.00109 | 1.87761 | 1.43104  | 60  |
| YAP7_H2O2Hi                                         | 0.03334 | 0.41578 | 1.79512  | 140 |
| YAP7_H2O2Lo                                         | 0.05524 | 0.57267 | 2.65722  | 151 |
