# Supplementary material for: Stochastic and Regulatory Role of Chromatin Silencing in Genomic Response to Environmental Changes
Source: PubMed Central journal article supplement (PMC2500160; doi:10.1371/journal.pone.0003002), 2008-08-20
Supplement: pone.0003002.s013.pdf [file pone.0003002.s013.pdf]

## Table S7

| Gene Ontology                                                                         | Sir2/3/4 | Set1    | Silencing | Noise (ypd) |
|---------------------------------------------------------------------------------------|----------|---------|-----------|-------------|
| meiosis                                                                               | 5.15246  | 2.73747 | 7.88993   | 0.02181     |
| meiotic cell cycle                                                                    | 5.15246  | 2.73747 | 7.88993   | 0.02181     |
| M phase of meiotic cell cycle                                                         | 5.15246  | 2.73747 | 7.88993   | 0.02181     |
| plasma membrane                                                                       | 3.44780  | 3.40590 | 6.85370   | 3.48456     |
| reproductive sporulation                                                              | 0.88829  | 5.94299 | 6.83128   | 0.12640     |
| sporulation (sensu Fungi)                                                             | 0.88829  | 5.94299 | 6.83128   | 0.12640     |
| sporulation                                                                           | 1.53524  | 5.24434 | 6.77958   | 0.09587     |
| response to pheromone                                                                 | 5.60563  | 1.05962 | 6.66525   | 0.13674     |
| external encapsulating structure                                                      | 5.64737  | 1.01539 | 6.66277   | 3.49671     |
| chitin- and beta-glucan-containing cell wall                                          | 5.64737  | 1.01539 | 6.66277   | 3.49671     |
| cell wall                                                                             | 5.64737  | 1.01539 | 6.66277   | 3.49671     |
| reproduction                                                                          | 3.42227  | 3.00400 | 6.42627   | 0.04275     |
| cellular developmental process                                                        | 1.87794  | 4.20617 | 6.08411   | 0.06360     |
| cell differentiation                                                                  | 1.87794  | 4.20617 | 6.08411   | 0.06360     |
| DNA-directed DNA polymerase activity                                                  | 5.39156  | 0.59300 | 5.98456   | 0.02915     |
| rRNA processing                                                                       | 0.00030  | 5.90716 | 5.90746   | 0.52297     |
| ribosome biogenesis and assembly                                                      | 0.00003  | 5.70717 | 5.70721   | 1.00876     |
| meiosis I                                                                             | 3.93431  | 1.65683 | 5.59114   | 0.13173     |
| rRNA metabolic process                                                                | 0.00043  | 5.51490 | 5.51532   | 0.57430     |
| oxidoreductase activity, acting on CH-OH group of donors                              | 0.46357  | 4.95574 | 5.41930   | 9.88909     |
| ribonucleoprotein complex biogenesis and assembly                                     | 0.00004  | 5.32963 | 5.32967   | 0.50401     |
| meiotic recombination                                                                 | 3.70292  | 1.61086 | 5.31377   | 0.26028     |
| sexual reproduction                                                                   | 4.01411  | 1.04259 | 5.05670   | 0.75636     |
| conjugation                                                                           | 4.01411  | 1.04259 | 5.05670   | 0.75636     |
| conjugation with cellular fusion                                                      | 4.01411  | 1.04259 | 5.05670   | 0.75636     |
| oxidoreductase activity, acting on the CH-OH group of donors, NAD or NADP as acceptor | 0.72268  | 4.32311 | 5.04580   | 8.94814     |
| reproductive process                                                                  | 1.60601  | 3.16778 | 4.77379   | 0.01708     |
| vitamin biosynthetic process                                                          | 0.62060  | 4.04467 | 4.66528   | 0.82628     |

|                                                                                 |         |         |         |         |
|---------------------------------------------------------------------------------|---------|---------|---------|---------|
| water-soluble vitamin biosynthetic process                                      | 0.62060 | 4.04467 | 4.66528 | 0.82628 |
| response to pheromone during conjugation with cellular fusion                   | 3.25157 | 1.38861 | 4.64017 | 0.33234 |
| regulation of conjugation with cellular fusion                                  | 3.80317 | 0.81454 | 4.61771 | 0.31494 |
| signal transduction during conjugation with cellular fusion                     | 3.80317 | 0.81454 | 4.61771 | 0.31494 |
| pheromone-dependent signal transduction during conjugation with cellular fusion | 3.80317 | 0.81454 | 4.61771 | 0.31494 |
| regulation of conjugation                                                       | 3.80317 | 0.81454 | 4.61771 | 0.31494 |
| vitamin metabolic process                                                       | 0.26644 | 4.29934 | 4.56578 | 3.80698 |
| water-soluble vitamin metabolic process                                         | 0.26644 | 4.29934 | 4.56578 | 3.80698 |
| G-protein coupled receptor protein signaling pathway                            | 2.56480 | 1.87018 | 4.43499 | 0.19351 |
| reproductive process in single-celled organism                                  | 0.88600 | 3.54598 | 4.43197 | 0.02741 |
| reproductive cellular process                                                   | 0.88600 | 3.54598 | 4.43197 | 0.02741 |
| nucleolus                                                                       | 0.00256 | 4.06201 | 4.06457 | 0.62628 |
| secondary active transmembrane transporter activity                             | 2.19286 | 1.82492 | 4.01778 | 2.20209 |
