# Supplementary material for: Stochastic and Regulatory Role of Chromatin Silencing in Genomic Response to Environmental Changes
Source: PubMed Central journal article supplement (PMC2500160; doi:10.1371/journal.pone.0003002), 2008-08-20
Supplement: pone.0003002.s014.pdf [file pone.0003002.s014.pdf]

# Table S8

| <b>stress condition</b>                    | <b>responsiveness</b> |
|--------------------------------------------|-----------------------|
| <b>constant.0.32.mM.H2O2..50.min..redo</b> | 10.16967              |
| <b>X1.5.mM.diamide..50.min.</b>            | 10.12476              |
| <b>X1.5.mM.diamide..30.min.</b>            | 9.60098               |
| <b>MAL33_H2O2Hi</b>                        | 9.51034               |
| <b>X1.5.mM.diamide..40.min.</b>            | 9.46265               |
| <b>X1.mM.Menadione..50.min.redo</b>        | 9.10940               |
| <b>PHO2_H2O2Hi</b>                         | 8.34421               |
| <b>X1.5.mM.diamide..20.min.</b>            | 8.19445               |
| <b>constant.0.32.mM.H2O2..60.min..redo</b> | 8.01224               |
| <b>RDS1_H2O2Hi</b>                         | 7.86457               |
| <b>X1.5.mM.diamide..60.min.</b>            | 7.67790               |
| <b>aa.starv.2.h</b>                        | 7.50441               |
| <b>X1.5.mM.diamide..10.min.</b>            | 7.12504               |
| <b>aa.starv.1.h</b>                        | 6.95960               |
| <b>constant.0.32.mM.H2O2..80.min..redo</b> | 6.17336               |
| <b>GZF3_RAPA</b>                           | 6.10360               |
| <b>X1mM.Menadione..40.min..redo</b>        | 6.08165               |
| X1.5.mM.diamide..90.min.                   | 5.35812               |
| constant.0.32.mM.H2O2..100.min..redo       | 5.19361               |
| aa.starv.6.h                               | 5.16202               |
| Nitrogen.Depletion.2.h                     | 4.86709               |
| RPH1_H2O2Hi                                | 4.82796               |
| X1.mM.Menadione..80.min..redo              | 4.77925               |
| X1.mM.Menadione..105.min..redo             | 4.74282               |
| diauxic.shift.timecourse.18.5.h            | 4.72623               |
| X1.mM.Menadione..30.min..redo              | 4.71487               |
| heat.shock.33.to.37..20.minutes            | 4.56492               |
| XBP1_H2O2Lo                                | 4.51483               |
| constant.0.32.mM.H2O2..120.min..redo       | 4.35662               |
| RTG3_RAPA                                  | 4.34976               |
| RIM101_H2O2Hi                              | 4.13256               |
| SIG1_H2O2Hi                                | 4.13256               |
| IME4_H2O2Hi                                | 4.12747               |
| X37C.to.25C.shock...45.min                 | 4.10700               |
| ROX1_H2O2Hi                                | 4.10196               |
| YAP7_H2O2Lo                                | 3.93031               |
| BAS1_SM                                    | 3.91415               |
| YAP6_H2O2Hi                                | 3.76100               |
| YAP1_H2O2Lo                                | 3.68863               |
| GAL4_RAFF                                  | 3.59181               |
| aa.starv.0.5.h                             | 3.53335               |
| NRG1_H2O2Hi                                | 3.52158               |
| ARR1_H2O2Hi                                | 3.50529               |
| YAP5_H2O2Hi                                | 3.50529               |
| diauxic.shift.timecourse.20.5.h            | 3.37940               |
| constant.0.32.mM.H2O2..30.min..redo        | 3.30101               |

|                                                      |         |
|------------------------------------------------------|---------|
| Nitrogen.Depletion.2.d                               | 3.27345 |
| aa.starv.4.h                                         | 3.13906 |
| YAP7_H2O2Hi                                          | 3.12924 |
| Nitrogen.Depletion.1.d                               | 3.12825 |
| SOK2_BUT14                                           | 3.10540 |
| Nitrogen.Depletion.3.d                               | 3.07903 |
| Nitrogen.Depletion.5.d                               | 3.05690 |
| constant.0.32.mM.H2O2..160.min..redo                 | 2.96587 |
| X1.mM.Menadione..160.min..redo                       | 2.89254 |
| Nitrogen.Depletion.4.h                               | 2.87166 |
| PHO2_SM                                              | 2.84705 |
| MSN2_H2O2Hi                                          | 2.83060 |
| diauxic.shift.timecourse.13.5.h                      | 2.80054 |
| MSS11_BUT14                                          | 2.73877 |
| IME1_H2O2Hi                                          | 2.70652 |
| HSF1_HEAT                                            | 2.70652 |
| X1.5.mM.diamide..5.min.                              | 2.67464 |
| RCS1_H2O2Hi                                          | 2.64989 |
| Nitrogen.Depletion.12.h                              | 2.63836 |
| heat.shock.17.to.37..20.minutes                      | 2.61756 |
| dt.060.min.dtt.2                                     | 2.60443 |
| constant.0.32.mM.H2O2..20.min..redo                  | 2.60438 |
| constant.0.32.mM.H2O2..10.min..redo                  | 2.60178 |
| heat.shock.21.to.37..20.minutes                      | 2.59306 |
| X29C..1M.sorbitol.to.33C....NO.sorbitol...15.minutes | 2.51554 |
| Nitrogen.Depletion.8.h                               | 2.33235 |
| Heat.Shock.15.minutes.hs.1                           | 2.29054 |
| X1.mM.Menadione..10.min.redo                         | 2.28391 |
| heat.shock.25.to.37..20.minutes                      | 2.27155 |
| Heat.Shock.30.minutes.hs.1                           | 2.24009 |
| AFT2_H2O2Hi                                          | 2.21956 |
| heat.shock.29.to.37..20.minutes                      | 2.18641 |
| UGA3_RAPA                                            | 2.15487 |
| GCN4_SM                                              | 2.07427 |
| RTG3_H2O2Lo                                          | 2.03737 |
| GLN3_RAPA                                            | 1.99353 |
| Heat.Shock.015.minutes..hs.2                         | 1.99112 |
| Nitrogen.Depletion.1.h                               | 1.97187 |
| X1M.sorbitol...15.min                                | 1.91130 |
| dt.240.min.dtt.2                                     | 1.87830 |
| STP1_SM                                              | 1.83256 |
| X37C.to.25C.shock...15.min                           | 1.82434 |
| Nitrogen.Depletion.30.min.                           | 1.79039 |
| Heat.Shock.000.minutes..hs.2                         | 1.76679 |
| UGA3_SM                                              | 1.75624 |
| MOT3_H2O2Hi                                          | 1.75624 |
| Hypo.osmotic.shock...60.min                          | 1.75265 |
| GCN4_RAPA                                            | 1.74498 |
| X29C..1M.sorbitol.to.33C...1M.sorbitol...15.minutes  | 1.74333 |

|                                                     |         |
|-----------------------------------------------------|---------|
| constant.0.32.mM.H2O2..40.min..rescan               | 1.66702 |
| GZF3_H2O2Hi                                         | 1.64429 |
| RPN4_H2O2Hi                                         | 1.64429 |
| Heat.Shock.20.minutes.hs.1                          | 1.57349 |
| X29C..1M.sorbitol.to.33C...1M.sorbitol...30.minutes | 1.52749 |
| Hypo.osmotic.shock...30.min                         | 1.52141 |
| Heat.Shock.000.minutes..hs.2.1                      | 1.51755 |
| dt.000.min..dt.2                                    | 1.48575 |
| Heat.Shock.000.minutes.hs.2                         | 1.46001 |
| MSN2_H2O2Lo                                         | 1.45276 |
| NRG1_H2O2Lo                                         | 1.45276 |
| X29C.to.33C...15.minutes                            | 1.40276 |
| dt.015.min.dtt.2                                    | 1.39944 |
| Hypo.osmotic.shock...5.min                          | 1.39760 |
| PUT3_H2O2Lo                                         | 1.39571 |
| X2.5mM.DTT.015.min.dtt.1                            | 1.38552 |
| MOT3_SM                                             | 1.38331 |
| X29C..1M.sorbitol.to.33C....NO.sorbitol...5.minutes | 1.33838 |
| Heat.Shock.030inutes..hs.2                          | 1.32052 |
| Heat.Shock.10.minutes.hs.1                          | 1.30336 |
| X29C.to.33C...5.minutes                             | 1.30205 |
| X1M.sorbitol...30.min                               | 1.29317 |
| DAL81_RAPA                                          | 1.28536 |
| X1.mM.Menadione..20.min..redo                       | 1.28429 |
| Heat.Shock.60.minutes.hs.1                          | 1.24269 |
| RPN4_H2O2Lo                                         | 1.21897 |
| Heat.Shock.060.minutes..hs.2                        | 1.20712 |
| GCR2_SM                                             | 1.20122 |
| MSN4_H2O2Lo                                         | 1.19617 |
| X1M.sorbitol...60.min                               | 1.19054 |
| MSN4_RAPA                                           | 1.17786 |
| dt.030.min..dt.2                                    | 1.17384 |
| Heat.Shock.40.minutes.hs.1                          | 1.15806 |
| X37C.to.25C.shock...30.min                          | 1.14278 |
| X1M.sorbitol...5.min                                | 1.12450 |
| dt.120.min.dtt.2                                    | 1.12004 |
| SIP4_SM                                             | 1.09788 |
| X29C.to.33C...30.minutes                            | 1.02393 |
| AFT2_H2O2Lo                                         | 1.01048 |
| Hypo.osmotic.shock...45.min                         | 0.98783 |
| MSN4_H2O2Hi                                         | 0.91611 |
| Heat.Shock.05.minutes.hs.1                          | 0.89253 |
| LEU3_SM                                             | 0.88152 |
| GAT1_RAPA                                           | 0.88152 |
| diauxic.shift.timecourse.15.5.h                     | 0.88115 |
| X37C.to.25C.shock...90.min                          | 0.86294 |
| MET4_SM                                             | 0.85348 |
| X29C..1M.sorbitol.to.33C...1M.sorbitol...5.minutes  | 0.83376 |
| X2.5mM.DTT.005.min.dtt.1                            | 0.81001 |

|                                                      |         |
|------------------------------------------------------|---------|
| X2.5mM.DTT.180.min.dtt.1                             | 0.79255 |
| X1M.sorbitol...120.min                               | 0.78037 |
| FKH2_H2O2Lo                                          | 0.77895 |
| X2.5mM.DTT.090.min.dtt.1                             | 0.76949 |
| RTG3_SM                                              | 0.75684 |
| steady.state.1M.sorbitol                             | 0.75645 |
| X1M.sorbitol...45.min                                | 0.74726 |
| X33C.vs..30C...90.minutes                            | 0.72393 |
| CBF1_SM                                              | 0.67454 |
| X2.5mM.DTT.060.min.dtt.1                             | 0.66900 |
| TEC1_BUT14                                           | 0.64590 |
| DAL80_RAPA                                           | 0.61545 |
| GAL4_GAL                                             | 0.60121 |
| X2.5mM.DTT.030.min.dtt.1                             | 0.57620 |
| X2.5mM.DTT.120.min.dtt.1                             | 0.55207 |
| X1M.sorbitol...90.min                                | 0.54964 |
| X1.mM.Menadione..120.min.redo                        | 0.53133 |
| GAT1_SM                                              | 0.52697 |
| THI2_Thi.                                            | 0.52697 |
| Heat.Shock.80.minutes.hs.1                           | 0.49701 |
| MSN2_RAPA                                            | 0.48605 |
| ASH1_BUT14                                           | 0.48605 |
| Hypo.osmotic.shock...15.min                          | 0.45177 |
| RIM101_H2O2Lo                                        | 0.45037 |
| DAL82_SM                                             | 0.41895 |
| YAP6_H2O2Lo                                          | 0.41167 |
| MBP1_H2O2Lo                                          | 0.40460 |
| Diauxic.Shift.Timecourse...0.h                       | 0.33497 |
| dtt.480.min.dtt.2                                    | 0.33119 |
| DAL81_SM                                             | 0.26351 |
| HAP4_SM                                              | 0.26351 |
| PHO2_H2O2Lo                                          | 0.26351 |
| RPH1_H2O2Lo                                          | 0.26351 |
| PHO2_Pi.                                             | 0.26351 |
| diauxic.shift.timecourse11.5                         | 0.26285 |
| KSS1_BUT90                                           | 0.24928 |
| MTH1_GAL                                             | 0.24928 |
| X29C..1M.sorbitol.to.33C....NO.sorbitol...30.minutes | 0.24570 |
| CAD1_H2O2Hi                                          | 0.23000 |
| KSS1_Alpha                                           | 0.23000 |
| SKN7_H2O2Lo                                          | 0.22322 |
| ADR1_SM                                              | 0.22252 |
| SFP1_H2O2Hi                                          | 0.22252 |
| MOT3_H2O2Lo                                          | 0.22252 |
| UME6_H2O2Hi                                          | 0.22106 |
| RTG1_SM                                              | 0.21591 |
| MIG2_H2O2Hi                                          | 0.21591 |
| ROX1_H2O2Lo                                          | 0.21591 |
| MSN4_Acid                                            | 0.21591 |

|                                |         |
|--------------------------------|---------|
| YAP1_H2O2Hi                    | 0.20995 |
| X2.5mM.DTT.045.min.dtt.1       | 0.20680 |
| PDR1_H2O2Lo                    | 0.20450 |
| diauxic.shift.timecourse.9.5.h | 0.20336 |
| PHD1_BUT90                     | 0.19582 |
| ARG80_SM                       | 0.19481 |
| YJL206C_H2O2Lo                 | 0.19481 |
| SKN7_HEAT                      | 0.18633 |
| YJL206C_H2O2Hi                 | 0.18244 |
| MET31_SM                       | 0.17876 |
| RPH1_SM                        | 0.17876 |
| ADR1_HEAT                      | 0.17876 |
| HSF1_H2O2Hi                    | 0.17049 |
| MAC1_H2O2Hi                    | 0.16566 |
| SFP1_H2O2Lo                    | 0.16566 |
| MBP1_H2O2Hi                    | 0.15263 |
| RCS1_SM                        | 0.14956 |
| HAP4_H2O2Lo                    | 0.14956 |
| CAD1_SM                        | 0.14488 |
| ARG81_SM                       | 0.14048 |
| PUT3_SM                        | 0.13838 |
| RTG1_RAPA                      | 0.13434 |
| MSN2_Acid                      | 0.13434 |
| PHO4_Pi.                       | 0.13434 |
| ARO80_SM                       | 0.13240 |
| CHA4_SM                        | 0.12341 |
| HAP5_SM                        | 0.12010 |
| X37C.to.25C.shock...60.min     | 0.11963 |
| MET32_SM                       | 0.11694 |
| HAP2_RAPA                      | 0.11541 |
| DIG1_BUT90                     | 0.11541 |
| TEC1_Alpha                     | 0.11392 |
| SFP1_SM                        | 0.10961 |
| GLN3_SM                        | 0.10426 |
| DAL82_RAPA                     | 0.09696 |
| REB1_H2O2Hi                    | 0.09360 |
| DIG1_BUT14                     | 0.08541 |
| DIG1_Alpha                     | 0.07736 |
| CIN5_H2O2Hi                    | 0.07333 |
| HSF1_H2O2Lo                    | 0.05911 |
| SKN7_H2O2Hi                    | 0.05853 |
| STE12_BUT90                    | 0.05738 |
| MCM1_Alpha                     | 0.05626 |
| FKH2_H2O2Hi                    | 0.05571 |
| STE12_Alpha                    | 0.04729 |
| RCS1_H2O2Lo                    | 0.04596 |
| CIN5_H2O2Lo                    | 0.04553 |
| STE12_BUT14                    | 0.04305 |
| Heat.Shock.005.minutes..hs.2   | 0.03696 |

|              |         |
|--------------|---------|
| FHL1_RAPA    | 0.02602 |
| FHL1_SM      | 0.02324 |
| MET28_SM     | 0.00000 |
| RAP1_SM      | 0.00000 |
| FHL1_H2O2Hi  | 0.00000 |
| YAP3_H2O2Hi  | 0.00000 |
| MAL33_H2O2Lo | 0.00000 |
| REB1_H2O2Lo  | 0.00000 |
| PHD1_BUT14   | 0.00000 |
| RLM1_BUT14   | 0.00000 |
| MIG1_GAL     | 0.00000 |
| RGT1_GAL     | 0.00000 |
| GAT1_HEAT    | 0.00000 |
| MSN2_HEAT    | 0.00000 |
| YAP1_HEAT    | 0.00000 |
