# Supplementary material for: Stochastic and Regulatory Role of Chromatin Silencing in Genomic Response to Environmental Changes
Source: PLOS journal article supplement (doi:10.1371/journal.pone.0003002), 2008-08-19
Supplement: S11 (10.1371/journal.pone.0003002.s011) [file journal.pone.0003002.s011]

**Table S5.** Functional description of consecutively located genes in genomic regions where high silencing activity measures of Sir2/3/4 or Set1 are found (see Fig. 1).

| <b>Gene name</b> | <b>Functional description (quoted from the <i>Saccharomyces</i> genome database, <a href="http://www.yeastgenome.org">http://www.yeastgenome.org</a>)</b> |
|------------------|-----------------------------------------------------------------------------------------------------------------------------------------------------------|
| SPS4             | SPorulation Specific transcript; protein whose expression is induced during sporulation                                                                   |
| SFG1             | SuperFicial pseudohyphal Growth; putative transcription factor required for growth of superficial pseudohyphae                                            |
| MND1             | Meiotic Nuclear Divisions; protein required for recombination and meiotic nuclear division                                                                |
| GTS1             | zinc-finger protein that regulates ultradian rhythm, cell size, cell cycle, lifespan, sporulation, heat tolerance, and multidrug transport                |
| ATG1             | protein required for autophagy; null mutants are defective in sporulation                                                                                 |
| RME1             | Regulator of MEiosis; zinc-finger protein involved in regulation of mating and meiosis; mediates cell type control of sporulation                         |
| NQM1             | protein induced by alpha-factor and during diauxic shift; null mutant non-quiescent cells exhibit reduced reproductive capacity                           |
